# Supplementary material for: Assemblage Structure of the Ichthyoplankton and Its Relationship With Environmental Factors in Spring and Autumn off the Pearl River Estuary
Source: Frontiers journal article supplement (doi:10.3389/fmars.2021.732970), 2021-09-16
Supplement: Table_1.XLSX [file Table_1.XLSX]

## Sheet: Sheet1
Sample name	Status	Best match species	Genbank number	Similiarity%	Nearest species	Genbank number	Similiarity%	Distance to the best match species%	Distance to the nearest species%	BM>98% similarity, NN<2%	First delimitation	Secondarily delimitation	final taxa	Habitat	Note
GDYH4196	egg	Ophichthus shaoi	MG702302	90.74	Pisodonophis cancrivorus	MK777102	89.8			Case III
GDYH4198	egg	Tentoriceps cristatus	KU878691	100	Tentoriceps sp. JP-2017	KY675418	93.33			Case I	Tentoriceps cristatus		Tentoriceps cristatus	benthopelagic
GDYH4199	egg	Trichiurus lepturus	JF952882	100	Trichiurus japonicus	KT718386	100			Case II		Trichiurus japonicus	Trichiurus japonicus	benthopelagic
GDYH4200	egg	Trichiurus lepturus	KP267586	99.85	Trichiurus sp. 2-Nakabo NO-2017	LC269196	99.84			Case II		Trichiurus japonicus	Trichiurus japonicus	benthopelagic
GDYH4202	egg	Tentoriceps cristatus	KU878691	100	Tentoriceps sp. JP-2017	KY675418	93.33			Case I	Tentoriceps cristatus		Tentoriceps cristatus	benthopelagic
GDYH4203	egg	Trichiurus sp. 2-Nakabo NO-2017	LC269196	100	Trichiurus lepturus	MH085794	100			Case II		Trichiurus nanhaiensis	Trichiurus nanhaiensis	benthopelagic
GDYH4206	egg	Tentoriceps cristatus	KU878691	100	Tentoriceps sp. JP-2017	KY675418	93.33			Case I	Tentoriceps cristatus		Tentoriceps cristatus	benthopelagic
GDYH4207	egg	Tentoriceps cristatus	KU878691	100	Tentoriceps sp. JP-2017	KY675418	93.33			Case I	Tentoriceps cristatus		Tentoriceps cristatus	benthopelagic
GDYH4208	egg	Tentoriceps cristatus	KU878691	100	Tentoriceps sp. JP-2017	KY675418	93.33			Case I	Tentoriceps cristatus		Tentoriceps cristatus	benthopelagic
GDYH4209	egg	Trachinocephalus myops	EU595324	100	Trachinocephalus trachinus	MF040916	99.85			Case II		Trachinocephalus myops	Trachinocephalus myops	reef-associated	MF040916 have been amended to T.myops in the NCBI
GDYH4211	egg	Psenopsis anomala	EU595251	100	Thunnus tonggol	KT718293	99.66			Case II		Psenopsis anomala	Psenopsis anomala	benthopelagic	KT718293 is unverified in NCBI
GDYH4212	egg	Psenopsis anomala	EU595251	100	Thunnus tonggol	KT718293	99.66			Case II		Psenopsis anomala	Psenopsis anomala	benthopelagic	KT718293 is unverified in NCBI
GDYH4213	egg	Trachinocephalus myops	EU595324	100	Trachinocephalus trachinus	MF040916	99.85			Case II		Trachinocephalus myops	Trachinocephalus myops	reef-associated	MF040916 have been amended to T.myops in the NCBI
GDYH4214	egg	Seriolina nigrofasciata	KU535575	100	Seriola quinqueradiata	NC_016868	88.48			Case I	Seriolina nigrofasciata		Seriolina nigrofasciata	reef-associated
GDYH4218	egg	Decapterus maruadsi	LC569716	100			null			Case I	Decapterus maruadsi		Decapterus maruadsi	reef-associated
GDYH4220	egg	Decapterus maruadsi	LC569716	99.85			null			Case I	Decapterus maruadsi		Decapterus maruadsi	reef-associated
GDYH4221	egg	Saurida undosquamis	MT511723	100	Saurida elongata	KT718130	100			Case II		Saurida undosquamis	Saurida undosquamis	reef-associated
GDYH4224	egg	Lutjanus russellii	KC130841	100	Lutjanus monostigma	JF952788	100			Case II		Lutjanus russellii	Lutjanus russellii	reef-associated
GDYH4225	egg	Decapterus maruadsi	KX610924	100			null			Case I	Decapterus maruadsi		Decapterus maruadsi	reef-associated
GDYH4226	egg	Lutjanus russellii	KF830964	100	Lutjanus monostigma	JF952788	99.85			Case II		Lutjanus russellii	Lutjanus russellii	reef-associated
GDYH4282	egg	Trichiurus lepturus	JF952882	100	Trichiurus japonicus	KT718386	100			Case II		Trichiurus japonicus	Trichiurus japonicus	benthopelagic
GDYH4283	egg	Trichiurus japonicus	MF415182	100	Trichiurus lepturus	GU970082	100			Case II		Trichiurus japonicus	Trichiurus japonicus	benthopelagic
GDYH4284	egg	Trichiurus lepturus	JF952882	99.85	Trichiurus japonicus	NC_011719	99.85			Case II		Trichiurus japonicus	Trichiurus japonicus	benthopelagic
GDYH4294	egg	Decapterus maruadsi	KX610908	100	Decapterus russelli	MT076576	99.69			Case II		Decapterus maruadsi	Decapterus maruadsi	reef-associated
GDYH4295	egg	Decapterus maruadsi	LC569716	100			null			Case I	Decapterus maruadsi		Decapterus maruadsi	reef-associated
GDYH4296	egg	Decapterus maruadsi	KX610908	100	Decapterus russelli	MT076576	99.69			Case II		Decapterus maruadsi	Decapterus maruadsi	reef-associated
GDYH4297	egg	Decapterus maruadsi	LC569716	100			null			Case I	Decapterus maruadsi		Decapterus maruadsi	reef-associated
GDYH4298	egg	Decapterus maruadsi	LC569716	100			null			Case I	Decapterus maruadsi		Decapterus maruadsi	reef-associated
GDYH4301	egg	Decapterus maruadsi	LC569716	100			null			Case I	Decapterus maruadsi		Decapterus maruadsi	reef-associated
GDYH4306	egg	Strophidon tetraporus	MT318379	99.69	Strophidon sathete	MK777096	99.64			Case II		Strophidon tetraporus	Strophidon tetraporus	reef-associated	new species by Huang et al.(2020)
GDYH4307	egg	Saurida undosquamis	MT511723	100	Saurida elongata	KT718130	100			Case II		Saurida undosquamis	Saurida undosquamis	reef-associated
GDYH4309	egg	Rogadius asper	KP267610	99.85	Ratabulus megacephalus	KU943408	99.82			Case II		Rogadius asper	Rogadius asper	demersal
GDYH4310	egg	Samaris cristatus	MK617172	100	Samaris sp. KKB-2015	KR231814	92.13			Case I	Samaris cristatus		Samaris cristatus	demersal
GDYH4311	egg	Saurida undosquamis	MT511723	100	Saurida elongata	KT718130	100			Case II		Saurida undosquamis	Saurida undosquamis	reef-associated
GDYH4312	egg	Decapterus maruadsi	KX610908	100	Decapterus russelli	MT076576	99.69			Case II		Decapterus maruadsi	Decapterus maruadsi	reef-associated
GDYH4317	egg	Tentoriceps cristatus	KU945020	99.64	Tentoriceps sp. JP-2017	KY675418	93.33			Case I	Tentoriceps cristatus		Tentoriceps cristatus	benthopelagic
GDYH4319	egg	Tentoriceps cristatus	KU878691	99.83	Tentoriceps sp. JP-2017	KY675418	93.5			Case I	Tentoriceps cristatus		Tentoriceps cristatus	benthopelagic
GDYH4320	egg	Euthynnus affinis	DQ885009	100	Euthynnus lineatus	KX419587	99.6			Case II		Euthynnus affinis	Euthynnus affinis	pelagic-neritic
GDYH4322	egg	Euthynnus affinis	DQ885009	100	Euthynnus lineatus	KX419587	99.6			Case II		Euthynnus affinis	Euthynnus affinis	pelagic-neritic
GDYH4324	egg	Decapterus maruadsi	LC569716	100			null			Case I	Decapterus maruadsi		Decapterus maruadsi	reef-associated
GDYH4325	egg	Decapterus maruadsi	KX610925	100			null			Case I	Decapterus maruadsi		Decapterus maruadsi	reef-associated
GDYH4326	egg	Decapterus maruadsi	LC569716	100			null			Case I	Decapterus maruadsi		Decapterus maruadsi	reef-associated
GDYH4328	egg	Decapterus macrosoma	LC569715	99.85	Decapterus muroadsi	HQ010055	99.15			Case II		Decapterus macrosoma	Decapterus macrosoma	reef-associated
GDYH4329	egg	Lutjanus russellii	MH085870	100	Lutjanus monostigma	MK777456	100			Case II		Lutjanus russellii	Lutjanus russellii	reef-associated
GDYH4397	egg	Brachysomophis crocodilinus	KY081398	94.78	Brachysomophis cirrocheilos	MG702275	92.32			Case III
GDYH4398	egg	Uranoscopus kaianus	KY372357	99.21	Uranoscopus oligolepis	KY372366	98.89	Case II		Case II		Uranoscopus oligolepis	Uranoscopus tosae	demersal
GDYH4399	egg	Uranoscopus oligolepis	MK777857	100	Uranoscopus tosae	KX641475	99.08			Case II		Uranoscopus oligolepis	Uranoscopus tosae	demersal
GDYH4400	egg	Uranoscopus oligolepis	FJ237963	99.85	Uranoscopus tosae	KX641475	99.39			Case II		Uranoscopus oligolepis	Uranoscopus tosae	demersal
GDYH4401	egg	Trichiurus japonicus	KF788279	100	Trichiurus lepturus	KT733054	100			Case II		Trichiurus japonicus	Trichiurus japonicus	benthopelagic
GDYH4402	egg	Tentoriceps cristatus	KU878691	100	Tentoriceps sp. JP-2017	KY675418	93.33			Case I	Tentoriceps cristatus		Tentoriceps cristatus	benthopelagic
GDYH4403	egg	Uranoscopus oligolepis	KT718156	100	Uranoscopus tosae	KX641475	99.85			Case II		Uranoscopus oligolepis	Uranoscopus tosae	demersal
GDYH4404	egg	Fistularia petimba	KT444002	100	Fistularia corneta	KY572869	86.07			Case I	Fistularia petimba		Fistularia petimba	reef-associated
GDYH4405	egg	Tentoriceps cristatus	KU878691	100	Tentoriceps sp. JP-2017	KY675418	93.33			Case I	Tentoriceps cristatus		Tentoriceps cristatus	benthopelagic
GDYH4407	egg	Uranoscopus oligolepis	FJ237963	99.85	Uranoscopus tosae	KX641475	99.39			Case II		Uranoscopus oligolepis	Uranoscopus tosae	demersal
GDYH4414	egg	Saurenchelys fierasfer	KT229561	99.32	Saurenchelys sp.	GU673359	96.31			Case I	Saurenchelys fierasfer		Saurenchelys fierasfer	demersal
GDYH4421	egg	Ophisurus serpens	KX586208	100	Ophisurus macrorhynchos	MF539678	89.8			Case I	Ophisurus serpens		Ophisurus serpens	demersal
GDYH4422	egg	Ophisurus serpens	KX586208	89.81	Ophisurus macrorhynchos	MF539678	89.8			Case III
GDYH4423	egg	Ophisurus serpens	KX586208	89.81	Ophisurus macrorhynchos	MF539678	89.8			Case III
GDYH4426	egg	Tentoriceps cristatus	KU878691	100	Tentoriceps sp. JP-2017	KY675418	93.33			Case I	Tentoriceps cristatus		Tentoriceps cristatus	benthopelagic
GDYH4427	egg	Trichiurus lepturus	MH085793	100	Trichiurus nanhaiensis	KU945022	99.82			Case II		Trichiurus nanhaiensis	Trichiurus nanhaiensis	benthopelagic
GDYH4428	egg	Trichiurus japonicus	KF788259	100	Trichiurus lepturus	GU970084	100			Case II		Trichiurus japonicus	Trichiurus japonicus	benthopelagic
GDYH4429	egg	Trichiurus lepturus	MH085794	100	Trichiurus nanhaiensis	KU945022	100			Case II		Trichiurus nanhaiensis	Trichiurus nanhaiensis	benthopelagic
GDYH4431	egg	Rastrelliger brachysoma	DQ107678	100	Rastrelliger kanagurta	EF607536	100			Case II		Rastrelliger kanagurta	Rastrelliger kanagurta	pelagic-neritic
GDYH4432	egg	Trachinocephalus myops	EU595324	100	Trachinocephalus trachinus	MF040916	99.85			Case II		Trachinocephalus myops	Trachinocephalus myops	reef-associated	MF040916 have been amended to T.myops in the NCBI
GDYH4433	egg	Saurida undosquamis	MT511734	99.84	Saurida elongata	MK777113	99.83			Case II		Saurida undosquamis	Saurida undosquamis	reef-associated
GDYH4434	egg	Rogadius asper	KP267610	100	Ratabulus megacephalus	KU943408	100			Case II		Rogadius asper	Rogadius asper	demersal
GDYH4435	egg	Saurida elongata	JF952847	99.84	Saurida undosquamis	NC_003162	99.84			Case II		Saurida elongata	Saurida elongata	demersal
GDYH4436	egg	Ophichthus erabo	KU885618	98.08	Ophichthus polyophthalmus	JQ431944	87.96			Case I	Ophichthus erabo		Ophichthus erabo	reef-associated
GDYH4437	egg	Ophichthus erabo	KU885618	98.47	Ophichthus polyophthalmus	JQ431944	87.96			Case I	Ophichthus erabo		Ophichthus erabo	reef-associated
GDYH4438	egg	Ophichthus erabo	KU885618	98.66	Ophichthus polyophthalmus	JQ431944	87.65			Case I	Ophichthus erabo		Ophichthus erabo	reef-associated
GDYH4439	egg	Rastrelliger brachysoma	DQ107678	100	Rastrelliger kanagurta	EF607536	100			Case II		Rastrelliger kanagurta	Rastrelliger kanagurta	pelagic-neritic
GDYH4440	egg	Euthynnus affinis	DQ885009	100	Euthynnus lineatus	KX419587	99.6			Case II		Euthynnus affinis	Euthynnus affinis	pelagic-neritic
GDYH4441	egg	Euthynnus affinis	DQ885009	100	Euthynnus lineatus	KX419587	99.6			Case II		Euthynnus affinis	Euthynnus affinis	pelagic-neritic
GDYH4442	egg	Euthynnus affinis	DQ885009	100	Euthynnus lineatus	KX419587	99.6			Case II		Euthynnus affinis	Euthynnus affinis	pelagic-neritic
GDYH4443	egg	Euthynnus affinis	DQ885009	100	Euthynnus lineatus	KX419587	99.6			Case II		Euthynnus affinis	Euthynnus affinis	pelagic-neritic
GDYH4470	egg	Tentoriceps cristatus	KU878691	100	Tentoriceps sp. JP-2017	KY675418	93.33			Case I	Tentoriceps cristatus		Tentoriceps cristatus	benthopelagic
GDYH4471	egg	Tentoriceps cristatus	KU878691	100	Tentoriceps sp. JP-2017	KY675418	93.33			Case I	Tentoriceps cristatus		Tentoriceps cristatus	benthopelagic
GDYH4472	egg	Trichiurus lepturus	MH085793	100	Trichiurus nanhaiensis	KU945022	99.82			Case II		Trichiurus nanhaiensis	Trichiurus nanhaiensis	benthopelagic
GDYH4473	egg	Trachinocephalus myops	EU595324	100	Trachinocephalus trachinus	MF040916	99.85			Case II		Trachinocephalus myops	Trachinocephalus myops	reef-associated	MF040916 have been amended to T.myops in the NCBI
GDYH4476	egg	Ophisurus macrorhynchos	MF539678	89.62	Ophisurus serpens	KX586208	89.61			Case III
GDYH4477	egg	Trachinocephalus myops	EU595324	100	Trachinocephalus trachinus	MF040916	99.85			Case II		Trachinocephalus myops	Trachinocephalus myops	reef-associated	MF040916 have been amended to T.myops in the NCBI
GDYH4479	egg	Trachinocephalus myops	EU595324	100	Trachinocephalus trachinus	MF040916	99.85			Case II		Trachinocephalus myops	Trachinocephalus myops	reef-associated	MF040916 have been amended to T.myops in the NCBI
GDYH4480	egg	Trachinocephalus myops	EU595324	100	Trachinocephalus trachinus	MF040916	99.85			Case II		Trachinocephalus myops	Trachinocephalus myops	reef-associated	MF040916 have been amended to T.myops in the NCBI
GDYH4481	egg	Heteromycteris japonicus	JF952752	100	Aseraggodes kobensis	NC_024285	96.76			Case I	Heteromycteris japonicus		Heteromycteris japonicus	demersal
GDYH4482	egg	Psenopsis anomala	EU595250	99.69	Thunnus tonggol	KT718293	99.49			Case II		Psenopsis anomala	Psenopsis anomala	benthopelagic	KT718293 is unverified in NCBI
GDYH4483	egg	Champsodon sp. voucher 1740	KY176427	90.14	Champsodon nudivittis	MH807253	89.55			Case III
GDYH4484	egg	Trachinocephalus myops	EU595324	99.85	Trachinocephalus trachinus	MF040916	99.69			Case II		Trachinocephalus myops	Trachinocephalus myops	reef-associated	MF040916 have been amended to T.myops in the NCBI
GDYH4486	egg	Coryphaena hippurus	GU225570	99.85			null			Case I	Coryphaena hippurus		Coryphaena hippurus	pelagic-neritic
GDYH4492	egg	Lutjanus russellii	KC130841	100	Lutjanus monostigma	JF952788	100			Case II		Lutjanus russellii	Lutjanus russellii	reef-associated
GDYH4493	egg	Psenopsis anomala	EU595253	100	Thunnus tonggol	KT718293	99.83			Case II		Psenopsis anomala	Psenopsis anomala	benthopelagic	KT718293 is unverified in NCBI
GDYH4497	egg	Sarda orientalis	EF609592	99.85	Auxis thazard	MH638710	99.85			Case II		Auxis thazard	Auxis thazard	pelagic-neritic
GDYH4498	egg	Heteromycteris japonicus	JF952752	100	Aseraggodes kobensis	NC_024285	96.76			Case I	Heteromycteris japonicus		Heteromycteris japonicus	demersal
GDYH4501	egg	Coryphaena hippurus	KT718526	100			null			Case I	Coryphaena hippurus		Coryphaena hippurus	pelagic-neritic
GDYH4502	egg	Ophichthus erabo	KU885618	98.66	Ophichthus polyophthalmus|	JQ431944	88.12			Case I	Ophichthus erabo		Ophichthus erabo	reef-associated
GDYH4504	egg	Trichiurus sp. 2-Nakabo NO-2017	LC269196	100	Trichiurus lepturus	MH085794	100			Case II		Trichiurus nanhaiensis	Trichiurus nanhaiensis	benthopelagic
GDYH4505	egg	Coryphaena hippurus	GU225585	100			null			Case I	Coryphaena hippurus		Coryphaena hippurus	pelagic-neritic
GDYH4506	egg	Uranoscopus kaianus	KY372357	100	Uranoscopus oligolepis	KY372366	99.05			Case II		Uranoscopus oligolepis	Uranoscopus tosae	demersal
GDYH4509	egg	Trachinocephalus myops	EU595324	100	Trachinocephalus trachinus	MF040916	99.85			Case II		Trachinocephalus myops	Trachinocephalus myops	reef-associated	MF040916 have been amended to T.myops in the NCBI
GDYH4510	egg	Trachinocephalus myops	EU595324	100	Trachinocephalus trachinus	MF040916	99.85			Case II		Trachinocephalus myops	Trachinocephalus myops	reef-associated	MF040916 have been amended to T.myops in the NCBI
GDYH4511	egg	Lutjanus russellii	KC130841	100	Lutjanus monostigma	JF952788	100			Case II		Lutjanus russellii	Lutjanus russellii	reef-associated
GDYH4512	egg	Seriolina nigrofasciata	KU535575	100	Seriola quinqueradiata	NC_016868	88.48			Case I	Seriolina nigrofasciata		Seriolina nigrofasciata	reef-associated
GDYH4513	egg	Lutjanus russellii	KC130841	100	Lutjanus monostigma	JF952788	100			Case II		Lutjanus russellii	Lutjanus russellii	reef-associated
GDYH4596	egg	Trichiurus sp. 2-Nakabo NO-2017	LC269196	100	Trichiurus lepturus	MH085794	100			Case II		Trichiurus nanhaiensis	Trichiurus nanhaiensis	benthopelagic
GDYH4597	egg	Tentoriceps cristatus	KU878691	100	Tentoriceps sp. JP-2017	KY675418	93.33			Case I	Tentoriceps cristatus		Tentoriceps cristatus	benthopelagic
GDYH4606	egg	Decapterus maruadsi	LC569716	100			null			Case I	Decapterus maruadsi		Decapterus maruadsi	reef-associated
GDYH4607	egg	Selar crumenophthalmus	JQ431681	100			null			Case I	Selar crumenophthalmus		Selar crumenophthalmus	reef-associated
GDYH4608	egg	Trichiurus sp. 2-Nakabo NO-2017	LC269196	100	Trichiurus lepturus	MH085794	100			Case II		Trichiurus nanhaiensis	Trichiurus nanhaiensis	benthopelagic
GDYH4609	egg	Lutjanus russellii	KC130841	99.85	Lutjanus monostigma	JF952788	99.85			Case II		Lutjanus russellii	Lutjanus russellii	reef-associated
GDYH5558	larvae	Upeneus japonicus	KT718546	100	Upeneus margarethae	|MT348773	99.84			Case II		Upeneus japonicus	Upeneus japonicus	reef-associated
GDYH5559	larvae	Upeneus japonicus	JQ681514	100	Upeneus margarethae	MT348773	99.68			Case II		Upeneus japonicus	Upeneus japonicus	reef-associated
GDYH5562	larvae	Selar crumenophthalmus	MH085873	99.83			null			Case I	Selar crumenophthalmus		Selar crumenophthalmus	reef-associated
GDYH5563	larvae	Auxis rochei	KX419576	100	Auxis thazard	KX783618	99.51			Case II		Auxis rochei	Auxis rochei	pelagic-neritic
GDYH5564	larvae	Decapterus macrosoma	GU673628	100	Decapterus muroadsi	HQ010055	99.32			Case II		Decapterus macrosoma	Decapterus macrosoma	reef-associated
GDYH5565	larvae	Decapterus macrosoma	KP856777	100	Decapterus muroadsi	HQ010055	99.32			Case II		Decapterus macrosoma	Decapterus macrosoma	reef-associated
GDYH5566	larvae	Auxis rochei	KT718572	100	Auxis thazard	KX783618	99.83			Case II		Auxis rochei	Auxis rochei	pelagic-neritic
GDYH5575	larvae	Upeneus japonicus	KY372318	99.84	Upeneus margarethae	MT348773	99.67			Case II		Upeneus japonicus	Upeneus japonicus	reef-associated
GDYH5576	larvae	Chromis margaritifer	FJ583158	99.84	Chromis fieldi	MH287797	99.83			Case II		Chromis margaritifer	Chromis margaritifer	reef-associated
GDYH5577	larvae	Selar crumenophthalmus	JQ431681	100			null			Case I	Selar crumenophthalmus		Selar crumenophthalmus	reef-associated
GDYH5578	larvae	Decapterus macrosoma	JF493342	100	Decapterus muroadsi	HQ010055	99.32			Case II		Decapterus macrosoma	Decapterus macrosoma	reef-associated
GDYH5579	larvae	Decapterus macrosoma	GU673628	100			null			Case I	Decapterus macrosoma		Decapterus macrosoma	reef-associated
GDYH5580	larvae	Decapterus macrosoma	GU673628	100	Decapterus muroadsi	HQ010055	99.32			Case II		Decapterus macrosoma	Decapterus macrosoma	reef-associated
GDYH5583	larvae	Seriola dumerili	KY176627	99.84	Lichia amia	JQ623944	98.45			Case II		Seriola dumerili	Seriola dumerili	reef-associated
GDYH5588	larvae	Sarda orientalis	EF609590	100	Auxis rochei	KY802094	100			Case II		Auxis rochei	Auxis rochei	pelagic-neritic
GDYH5589	larvae	Sarda orientalis	EF609592	99.85	Auxis thazard	MH638710	99.85			Case II		Auxis thazard	Auxis thazard	pelagic-neritic
GDYH5590	larvae	Auxis thazard	KY402415	100	Auxis rochei	KM055420	99.84			Case II		Auxis thazard	Auxis thazard	pelagic-neritic
GDYH5591	larvae	Auxis thazard	KT718576	100	Auxis rochei	KT718414	100			Case II		Auxis rochei	Auxis rochei	pelagic-neritic
GDYH5592	larvae	Auxis rochei	KX419576	99.8	Auxis thazard	KX783618	99.68			Case II		Auxis rochei	Auxis rochei	pelagic-neritic
GDYH5593	larvae	Sarda orientalis	EF609592	100	Auxis thazard	MH638710	100			Case II		Auxis thazard	Auxis thazard	pelagic-neritic
GDYH5595	larvae	Auxis rochei	KT003865	100	Auxis thazard	KX783618	100			Case II		Auxis rochei	Auxis rochei	pelagic-neritic
GDYH5596	larvae	Auxis rochei	KT718359	100	Auxis thazard	KX783618	99.84			Case II		Auxis rochei	Auxis rochei	pelagic-neritic
GDYH5597	larvae	Auxis rochei	MT012638	100	Auxis thazard	KX783618	99.68			Case II		Auxis rochei	Auxis rochei	pelagic-neritic
GDYH5598	larvae	Auxis rochei	MT012638	100	Auxis thazard	KX783618	99.84			Case II		Auxis rochei	Auxis rochei	pelagic-neritic
GDYH5599	larvae	Auxis thazard	KJ134894	99.67	Sarda orientalis	EF609592	99.37			Case II		Auxis thazard	Auxis thazard	pelagic-neritic
GDYH5609	larvae	Upeneus japonicus	KU944136	99.55	Auxis thazard	KX419589	99.5			Case II		Upeneus japonicus	Upeneus japonicus	reef-associated
GDYH5610	larvae	Upeneus japonicus	KT718546	100	Upeneus margarethae	MT348773	99.83			Case II		Upeneus japonicus	Upeneus japonicus	reef-associated
GDYH5612	larvae	Upeneus japonicus	KT718546	100	Upeneus margarethae	MT348773	99.2			Case II		Upeneus japonicus	Upeneus japonicus	reef-associated
GDYH5626	larvae	Trichiurus lepturus	JF952883	100	Trichiurus japonicus	JN990867	99.85			Case II		Trichiurus japonicus	Trichiurus japonicus	benthopelagic
GDYH5636	egg	Trichiurus japonicus	KF788259	100	Trichiurus lepturus	GU970084	100			Case II		Trichiurus japonicus	Trichiurus japonicus	benthopelagic
GDYH5641	egg	Trichiurus lepturus	JF952882	100	Trichiurus japonicus	KT718386	100			Case II		Trichiurus japonicus	Trichiurus japonicus	benthopelagic
GDYH5657	egg	Decapterus maruadsi	KX610908	100	Decapterus russelli	MT076576	99.69			Case II		Decapterus maruadsi	Decapterus maruadsi	reef-associated
GDYH5658	larvae	Upeneus japonicus	EF607606	100	Upeneus margarethae	MT348773	98.74			Case II		Upeneus japonicus	Upeneus japonicus	reef-associated
GDYH5659	larvae	Upeneus japonicus	KU944132	100	Upeneus margarethae	MT348773	99.35			Case II		Upeneus japonicus	Upeneus japonicus	reef-associated
GDYH5661	egg	Trichiurus lepturus	JF952882	99.85	Trichiurus japonicus	NC_011719	99.85			Case II		Trichiurus japonicus	Trichiurus japonicus	benthopelagic
GDYH5665	egg	Saurida undosquamis	MT511723	100	Saurida elongata	KT718130	100			Case II		Saurida undosquamis	Saurida undosquamis	reef-associated
GDYH5666	egg	Saurida undosquamis	MT511723	100	Saurida elongata	KT718130	100			Case II		Saurida undosquamis	Saurida undosquamis	reef-associated
GDYH5667	egg	Saurida undosquamis	MT511723	100	Saurida elongata	KT718130	100			Case II		Saurida undosquamis	Saurida undosquamis	reef-associated
GDYH5679	egg	Oxyporhamphus micropterus	KX579979	98.77	Oxyporhamphus similis	KU360294	96.43			Case I	Oxyporhamphus micropterus		Oxyporhamphus micropterus	pelagic-oceanic
GDYH5680	larvae	Upeneus japonicus	KU944136	100	Upeneus margarethae	MT348773	99.67			Case II		Upeneus japonicus	Upeneus japonicus	reef-associated
GDYH5681	larvae	Hirundichthys oxycephalus	KX769040	99.84	Hirundichthys affinis	JQ842898	99.51			Case II			Hirundichthys sp.
GDYH5682	larvae	Upeneus japonicus	EF607606	100	Upeneus margarethae	MT348773	99.83			Case II		Upeneus japonicus	Upeneus japonicus	reef-associated
GDYH5683	larvae	Hirundichthys oxycephalus	KY067948	99.85	Hirundichthys speculiger	KX769058	99.84			Case II			Hirundichthys sp.
GDYH5684	larvae	Parexocoetus brachypterus	KX769022	99.51	Parexocoetus mento	KX769061	99.51			Case II			Parexocoetus sp.
GDYH5685	larvae	Upeneus japonicus	EF607606	100	Upeneus margarethae	MT348773	99.84			Case II		Upeneus japonicus	Upeneus japonicus	reef-associated
GDYH5688	larvae	Seriolina nigrofasciata	JX261025	100	Seriola quinqueradiata	NC_016868	88.29			Case I	Seriolina nigrofasciata		Seriolina nigrofasciata	reef-associated
GDYH5755	egg	Auxis thazard	DQ107702	99.85	Auxis rochei	KM055420	99.84			Case II		Auxis thazard	Auxis thazard	pelagic-neritic
GDYH5756	egg	Decapterus macrosoma	LC569715	100			null			Case I	Decapterus macrosoma		Decapterus macrosoma	reef-associated
GDYH5758	egg	Sarda orientalis	EF609592	100	Auxis thazard	MH638710	100			Case II		Auxis thazard	Auxis thazard	pelagic-neritic
GDYH5760	egg	Auxis thazard	DQ107701	99.85	Sarda orientalis	EF609592	99.69			Case II		Auxis thazard	Auxis thazard	pelagic-neritic
GDYH5761	egg	Sarda orientalis	EF609592	100	Auxis thazard	MH638710	100			Case II		Auxis thazard	Auxis thazard	pelagic-neritic
GDYH5762	egg	Auxis thazard	DQ107701	99.85	Sarda orientalis	EF609592	99.69			Case II		Auxis thazard	Auxis thazard	pelagic-neritic
GDYH5766	egg	Decapterus macrosoma	GU673628	100	Decapterus muroadsi	HQ010055	99.32			Case II		Decapterus macrosoma	Decapterus macrosoma	reef-associated
GDYH5769	egg	Sarda orientalis	EF609592	100	Auxis thazard	MH638710	100			Case II		Auxis thazard	Auxis thazard	pelagic-neritic
GDYH5771	egg	Auxis rochei	MH638691	100	Auxis thazard	KX783618	100			Case II		Auxis rochei	Auxis rochei	pelagic-neritic
GDYH5774	egg	Trichiurus sp. 2-Nakabo NO-2017	LC269196	100	Trichiurus lepturus	KP267586	100			Case II		Trichiurus nanhaiensis	Trichiurus nanhaiensis	benthopelagic
GDYH5798	larvae	Trichonotus sp.	KF489793	84.95	Eustomias furcifer	GQ860383	84.2			Case III			Trichonotus sp.
GDYH5799	larvae	Ostorhinchus novemfasciatus	MK777391	99.83	Ostorhinchus fasciatus	KU943673	99.64			Case II		Ostorhinchus fasciatus	Ostorhinchus fasciatus	reef-associated
GDYH5800	egg	Trichiurus sp. 2-Nakabo NO-2017	LC269196	100	Trichiurus lepturus	MH085794	100			Case II		Trichiurus nanhaiensis	Ostorhinchus fasciatus	reef-associated
GDYH5865	larvae	Upeneus japonicus	KU944135	100	Upeneus margarethae	MT348773	99.51			Case II		Upeneus japonicus	Upeneus japonicus	reef-associated
GDYH5867	larvae	Apogon novemfasciatus	HQ564503	99.84	Ostorhinchus fasciatus	KU943673	99.64			Case II		Ostorhinchus fasciatus	Ostorhinchus fasciatus	reef-associated
GDYH5869	larvae	Engyprosopon multisquama	MF628304	100	Arnoglossus polyspilus	EF607330	86.79			Case I	Engyprosopon multisquama		Ostorhinchus fasciatus	reef-associated
GDYH5882	egg	Decapterus maruadsi	LC569716	99.85			null			Case I	Decapterus maruadsi		Decapterus maruadsi	reef-associated
GDYH5891	egg	Trachinocephalus myops	EU595324	100	Trachinocephalus trachinus	MF040916	99.85			Case II		Trachinocephalus myops	Trachinocephalus myops	reef-associated	MF040916 have been amended to T.myops in the NCBI
GDYH5894	egg	Saurida elongata	JF952847	100	Saurida undosquamis	MT511724	100			Case II		Saurida elongata	Saurida elongata	demersal
GDYH5931	larvae	Lepturacanthus savala	EF607438	100	Trichiurus brevis	JN990853	100			Case II		Trichiurus brevis	Trichiurus brevis	benthopelagic
GDYH5934	egg	Ophichthus erabo	KU885618	98.47	Ophichthus polyophthalmus	JQ431944	87.79			Case I	Ophichthus erabo		Ophichthus erabo	reef-associated
GDYH5935	egg	Ophisurus macrorhynchos	MF539678	89.98	Ophisurus serpens	KX586208	89.97			Case III
GDYH5936	egg	Ophichthus frontalis	MF956899	88.33	Ophichthus mystacinus	MK391549	87.86			Case III
GDYH5937	egg	Trichiurus sp. 2-Nakabo NO-2017	LC269196	100	Trichiurus lepturus	MH085794	100			Case II		Trichiurus nanhaiensis	Trichiurus nanhaiensis	benthopelagic
GDYH5942	egg	Trachinocephalus myops	EU595324	100	Trachinocephalus trachinus	MF040916	99.85			Case II		Trachinocephalus myops	Trachinocephalus myops	reef-associated	MF040916 have been amended to T.myops in the NCBI
GDYH5946	egg	Saurida elongata	JF952847	100	Saurida undosquamis	MT511724	100			Case II		Saurida elongata	Saurida elongata	demersal
GDYH5948	larvae	Nemipterus virgatus	FJ237848	100	Nemipterus japonicus	NC_023972	100			Case II		Nemipterus virgatus	Nemipterus virgatus	demersal
GDYH5949	larvae	Arnoglossus tenuis	KP134337	100	Siganus rivulatus	KF564315	84.01			Case I	Arnoglossus tenuis		Arnoglossus tenuis	demersal
GDYH5950	egg	Tentoriceps cristatus	KU878691	100	Tentoriceps sp. JP-2017	KY675418	93.33			Case I	Tentoriceps cristatus		Tentoriceps cristatus	benthopelagic
GDYH5951	larvae	Psettina hainanensis	KP266862	87.01	Parabothus taiwanensis	MK617159	86.85			Case III
GDYH5952	larvae	Cyclothone signata	EU450654	85.27	Flagellostomias boureei	GQ860386	82.02			Case III			Cyclothone sp.
GDYH5960	egg	Trichiurus japonicus	KF788279	100	Trichiurus lepturus	KT733054	100			Case II		Trichiurus japonicus	Trichiurus japonicus	benthopelagic
GDYH5964	larvae	Auxis rochei	MH638691	99.85	Auxis thazard	HQ956263	99.85			Case II		Auxis rochei	Auxis rochei	pelagic-neritic
GDYH5965	larvae	Diaphus watasei	KC442072	100	Diaphus chrysorhynchus	AP012230	100			Case II			Diaphus watasei
GDYH5968	larvae	Rogadius asper	KP267610	100	Ratabulus megacephalus	KU943408	100			Case II		Rogadius asper	Rogadius asper	demersal
GDYH5969	larvae	Auxis rochei	KT718411	100	Auxis thazard	HQ956263	99.69			Case II		Auxis rochei	Auxis rochei	pelagic-neritic
GDYH5970	larvae	Auxis rochei	MH638763	100	Auxis thazard	HQ956263	99.85			Case II		Auxis rochei	Auxis rochei	pelagic-neritic
GDYH5972	larvae	Auxis rochei	MH638691	100	Auxis thazard	KX783618	100			Case II		Auxis rochei	Auxis rochei	pelagic-neritic
GDYH5973	larvae	Selar crumenophthalmus	JX261452	100			null			Case I	Selar crumenophthalmus		Selar crumenophthalmus	reef-associated
GDYH5974	larvae	Rogadius asper	KP267610	99.69	Ratabulus megacephalus	KU943408	99.63			Case II		Rogadius asper	Rogadius asper	demersal
GDYH5975	larvae	Bregmaceros sp. JP-2017	KY675482	92.21	Bregmaceros nectabanus	KU943122	92.03			Case III			Bregmaceros sp.
GDYH5978	egg	Tentoriceps cristatus	KU878691	100	Tentoriceps sp. JP-2017	KY675418	93.33			Case I	Tentoriceps cristatus		Tentoriceps cristatus	benthopelagic
GDYH5979	egg	Fistularia petimba	HQ564547	99.85	Fistularia corneta	KY572869	86.07			Case I	Fistularia petimba		Fistularia petimba	reef-associated
GDYH5980	egg	Fistularia petimba	HQ564547	99.69	Fistularia corneta	KY572869	85.76			Case I	Fistularia petimba		Fistularia petimba	reef-associated
GDYH5981	egg	Coryphaena hippurus	DQ885002	99.85			null			Case I	Coryphaena hippurus		Coryphaena hippurus	pelagic-neritic
GDYH5984	egg	Nemipterus bathybius	MN808444	100	Nemipterus balinensis	JN312853	96.93			Case I	Nemipterus bathybius		Nemipterus bathybius	demersal
GDYH5985	egg	Nemipterus bathybius	MN808444	100	Nemipterus balinensis	JN312853	96.93			Case I	Nemipterus bathybius		Nemipterus bathybius	demersal
GDYH5994	egg	Nemipterus bathybius	MN808444	100	Nemipterus balinensis	JN312853	96.93			Case I	Nemipterus bathybius		Nemipterus bathybius	demersal
GDYH5995	egg	Nemipterus bathybius	MN808444	100	Nemipterus balinensis	JN312853	96.93			Case I	Nemipterus bathybius		Nemipterus bathybius	demersal
GDYH5996	egg	Upeneus japonicus	EF607606	99.69	Upeneus margarethae	MT348773	99.51			Case II		Upeneus japonicus	Upeneus japonicus	reef-associated
GDYH5998	egg	Upeneus japonicus	EF607606	99.69	Upeneus margarethae	MT348773	99.51			Case II		Upeneus japonicus	Upeneus japonicus	reef-associated
GDYH5999	egg	Upeneus japonicus	EF607606	99.69	Upeneus margarethae	MT348773	99.51			Case II		Upeneus japonicus	Upeneus japonicus	reef-associated
GDYH6000	larvae	Psettina hainanensis	KP266862	99.53	Parabothus taiwanensis	MK617159	85.07			Case I	Psettina hainanensis		Psettina hainanensis	demersal
GDYH6002	egg	Upeneus japonicus	EF607606	99.69	Upeneus margarethae	MT348773	99.51			Case II		Upeneus japonicus	Upeneus japonicus	reef-associated
GDYH6006	larvae	Diaphus watasei	KC442072	100	Diaphus chrysorhynchus	AP012230	100			Case II			Diaphus watasei
GDYH6007	larvae	Auxis rochei	MH638691	100	Auxis thazard	KX783618	100			Case II		Auxis rochei	Auxis rochei	pelagic-neritic
GDYH6008	larvae	Chelidoperca stella	MK988077	98.53	Chelidoperca hirundinacea	MK988043	89.95			Case I	Chelidoperca stella		Chelidoperca stella	reef-associated
GDYH6009	larvae	Selar crumenophthalmus	JQ431681	100			null			Case I	Selar crumenophthalmus		Selar crumenophthalmus	reef-associated
GDYH6010	larvae	Auxis rochei	MH638691	100	Auxis thazard	KX783618	100			Case II		Auxis rochei	Auxis rochei	pelagic-neritic
GDYH6011	larvae	Ostorhinchus kiensis	KP267644	99.85	Ostorhinchus bryx	HQ956507	99.08			Case II			Ostorhinchus kiensis
GDYH6013	larvae	Decapterus macrosoma	GU673628	100	Decapterus muroadsi	HQ010055	99.32			Case II		Decapterus macrosoma	Decapterus macrosoma	reef-associated
GDYH6019	egg	Tentoriceps cristatus	KP267579	99.85	Tentoriceps sp. JP-2017	KY675418	93.17			Case I	Tentoriceps cristatus		Tentoriceps cristatus	benthopelagic
GDYH6021	egg	Trichiurus lepturus	JF952882	100	Trichiurus japonicus	KT718386	100			Case II		Trichiurus japonicus	Trichiurus japonicus	benthopelagic
GDYH6023	egg	Trichiurus lepturus	GU970084	99.83	Trichiurus japonicus	KF788259	99.8			Case II		Trichiurus japonicus	Trichiurus japonicus	benthopelagic
GDYH6025	egg	Seriolina nigrofasciata	KU535575	100	Seriola quinqueradiata	NC_016868	88.48			Case I	Seriolina nigrofasciata		Seriolina nigrofasciata	reef-associated
GDYH6045	larvae	Ictalurus furcatus	JF292379	86.84	Platydoras birindellii	MT712813	84.42			Case III
GDYH6046	larvae	Gnatholepis anjerensis	KU944877	84.78	Amblygobius sphynx	JQ349689	84.7			Case III
GDYH6061	egg	Nemipterus virgatus	FJ237848	100	Nemipterus japonicus	NC_023972	100			Case II		Nemipterus virgatus	Nemipterus virgatus	demersal
GDYH6066	larvae	Nemipterus virgatus	FJ237848	100	Nemipterus japonicus	NC_023972	100			Case II		Nemipterus virgatus	Nemipterus virgatus	demersal
GDYH6072	larvae	Bregmaceros sp. JP-2017	KY675482	92.21	Bregmaceros nectabanus	KU943122	91.3			Case III			Bregmaceros sp.
GDYH6073	larvae	Ictalurus furcatus	JF292379	85.98	Prionurus scalprum	KP280497	84.47			Case III
GDYH6105	egg	Ophichthus erabo	KU885618	99.04	Ophichthus polyophthalmus	JQ431944	87.96			Case I	Ophichthus erabo		Ophichthus erabo	reef-associated
GDYH6106	egg	Ophichthus erabo	KU885618	98.47	Ophichthus polyophthalmus	JQ431944	87.96			Case I	Ophichthus erabo		Ophichthus erabo	reef-associated
GDYH6123	egg	Euthynnus affinis	DQ885009	100	Euthynnus lineatus	KX419587	99.6			Case II		Euthynnus affinis	Euthynnus affinis	pelagic-neritic
GDYH6124	egg	Trachinocephalus myops	EU595324	100	Trachinocephalus trachinus	MF040916	99.85			Case II		Trachinocephalus myops	Trachinocephalus myops	reef-associated	MF040916 have been amended to T.myops in the NCBI
GDYH6125	egg	Euthynnus affinis	DQ885009	100	Euthynnus lineatus	KX419587	99.6			Case II		Euthynnus affinis	Euthynnus affinis	pelagic-neritic
GDYH6126	egg	Euthynnus affinis	DQ885009	100	Euthynnus lineatus	KX419587	99.6			Case II		Euthynnus affinis	Euthynnus affinis	pelagic-neritic
GDYH6127	egg	Saurida elongata	JF952847	100	Saurida undosquamis	MT511724	100			Case II		Saurida elongata	Saurida elongata	demersal
GDYH6128	egg	Euthynnus affinis	DQ885009	100	Euthynnus lineatus	KX419587	99.6			Case II		Euthynnus affinis	Euthynnus affinis	pelagic-neritic
GDYH6129	egg	Euthynnus affinis	DQ885009	100	Euthynnus lineatus	KX419587	99.6			Case II		Euthynnus affinis	Euthynnus affinis	pelagic-neritic
GDYH6130	egg	Euthynnus affinis	DQ885009	100	Euthynnus lineatus	KX419587	99.6			Case II		Euthynnus affinis	Euthynnus affinis	pelagic-neritic
GDYH6131	egg	Euthynnus affinis	DQ885009	100	Euthynnus lineatus	KX419587	99.6			Case II		Euthynnus affinis	Euthynnus affinis	pelagic-neritic
GDYH6134	egg	Euthynnus affinis	DQ885009	100	Euthynnus lineatus	KX419587	99.6			Case II		Euthynnus affinis	Euthynnus affinis	pelagic-neritic
GDYH6135	egg	Trachinocephalus myops	EU595324	100	Trachinocephalus trachinus	MF040916	99.85			Case II		Trachinocephalus myops	Trachinocephalus myops	reef-associated	MF040916 have been amended to T.myops in the NCBI
GDYH6136	egg	Euthynnus affinis	DQ885009	100	Euthynnus lineatus	KX419587	99.6			Case II		Euthynnus affinis	Euthynnus affinis	pelagic-neritic
GDYH6138	egg	Euthynnus affinis	DQ885009	100	Euthynnus lineatus	KX419587	99.6			Case II		Euthynnus affinis	Euthynnus affinis	pelagic-neritic
GDYH6139	egg	Euthynnus affinis	DQ885009	100	Euthynnus lineatus	KX419587	99.6			Case II		Euthynnus affinis	Euthynnus affinis	pelagic-neritic
GDYH6141	egg	Euthynnus affinis	DQ885009	100	Euthynnus lineatus	KX419587	99.6			Case II		Euthynnus affinis	Euthynnus affinis	pelagic-neritic
GDYH8151	egg	Trichiurus japonicus	KU942699	100	Trichiurus lepturus	KU945015	99.64			Case II		Trichiurus japonicus	Trichiurus japonicus	benthopelagic
GDYH8152	egg	Mene maculata	EF607445	100	Alepes djedaba	MK777147	84.74			Case I	Mene maculata		Mene maculata	reef-associated
GDYH8153	egg	Decapterus macrosoma	GU673628	100	Decapterus muroadsi	HQ010055	99.32			Case II		Decapterus macrosoma	Decapterus macrosoma	reef-associated
GDYH8154	egg	Decapterus macrosoma	MH638795	99.85	Decapterus muroadsi	HQ010055	99.15			Case II		Decapterus macrosoma	Decapterus macrosoma	reef-associated
GDYH8155	egg	Decapterus macrosoma	GU673628	100	Decapterus muroadsi	HQ010055	99.32			Case II		Decapterus macrosoma	Decapterus macrosoma	reef-associated
GDYH8156	egg	Decapterus macrosoma	GU673628	100	Decapterus muroadsi	HQ010055	99.32			Case II		Decapterus macrosoma	Decapterus macrosoma	reef-associated
GDYH8158	egg	Decapterus macrosoma	MH638795	100	Decapterus muroadsi	HQ010055	99.15			Case II		Decapterus macrosoma	Decapterus macrosoma	reef-associated
GDYH8159	egg	Decapterus macrosoma	GU673628	100	Decapterus muroadsi	HQ010055	99.32			Case II		Decapterus macrosoma	Decapterus macrosoma	reef-associated
GDYH8160	egg	Decapterus macrosoma	GU673628	100	Decapterus muroadsi	HQ010055	99.32			Case II		Decapterus macrosoma	Decapterus macrosoma	reef-associated
GDYH8161	egg	Decapterus macrosoma	MH638795	100	Decapterus muroadsi	HQ010055	99.15			Case II		Decapterus macrosoma	Decapterus macrosoma	reef-associated
GDYH8162	egg	Decapterus macrosoma	GU673628	100	Decapterus muroadsi	HQ010055	99.32			Case II		Decapterus macrosoma	Decapterus macrosoma	reef-associated
GDYH8163	egg	Decapterus macrosoma	GU673628	100	Decapterus muroadsi	HQ010055	99.32			Case II		Decapterus macrosoma	Decapterus macrosoma	reef-associated
GDYH8165	egg	Decapterus macrosoma	GU673628	100	Decapterus muroadsi	HQ010055	99.32			Case II		Decapterus macrosoma	Decapterus macrosoma	reef-associated
GDYH8166	egg	Decapterus macrosoma	GU673628	100	Decapterus muroadsi	HQ010055	99.32			Case II		Decapterus macrosoma	Decapterus macrosoma	reef-associated
GDYH8168	larvae	Selar crumenophthalmus	JQ431681	100			null			Case I	Selar crumenophthalmus		Selar crumenophthalmus	reef-associated
GDYH8169	egg	Strophidon tetraporus	MT318379	100	Strophidon sathete	MK777096	100			Case II		Strophidon tetraporus	Strophidon tetraporus	reef-associated	new species by Huang et al.(2020)
GDYH8170	egg	Oxyporhamphus micropterus	KX579979	98.92	Oxyporhamphus similis	KU360294	96.59			Case I	Oxyporhamphus micropterus		Oxyporhamphus micropterus	pelagic-oceanic
GDYH8171	egg	Chirocentrus dorab	MK777246	100	Chirocentrus cf. dorab	GU673690	100			Case II		Chirocentrus dorab	Chirocentrus dorab	reef-associated
GDYH8173	egg	Selar crumenophthalmus	MH638727	99.85			null			Case I	Selar crumenophthalmus		Selar crumenophthalmus	reef-associated
GDYH8174	egg	Selar crumenophthalmus	MH638727	99.85			null			Case I	Selar crumenophthalmus		Selar crumenophthalmus	reef-associated
GDYH8178	larvae	Iniistius verrens	KU944487	100	Iniistius pavo	JN311788	90.48			Case I	Iniistius verrens		Iniistius verrens	demersal
GDYH8179	larvae	Coryphaena equiselis	MH638696	99.85	Coryphaena hippurus	EU403059	90.38			Case I	Coryphaena equiselis		Coryphaena equiselis	pelagic-oceanic
GDYH8180	larvae	Iniistius verrens	JN242507	100	Iniistius pavo	JN311788	90.48			Case I	Iniistius verrens		Iniistius verrens	demersal
GDYH8181	larvae	Bregmaceros sp. JP-2017	KY675482	92.57	Bregmaceros nectabanus	KU943122	91.85			Case III			Bregmaceros sp.
GDYH8183	larvae	Jaydia carinata	KU943597	99.46	Jaydia queketti	KY176505	89.32			Case I	Jaydia carinata		Jaydia carinata	reef-associated
GDYH8184	larvae	Amblyeleotris downingi	MK340584	85.55	Vanderhorstia mertensi	KY176692	85.23			Case III
GDYH8185	larvae	Bregmaceros sp. JP-2017	KY675482	92.39	Bregmaceros nectabanus	KU943122	91.3			Case III			Bregmaceros sp.
GDYH8187	egg	Tentoriceps cristatus	KP267579	99.54	Tentoriceps sp. JP-2017	KY675418	93.17			Case I	Tentoriceps cristatus		Tentoriceps cristatus	benthopelagic
GDYH8188	egg	Coryphaena hippurus	GU225581	100			null			Case I	Coryphaena hippurus		Coryphaena hippurus	pelagic-neritic
GDYH8189	egg	Mene maculata	KT718545	100	Alepes djedaba	MK777147	84.74			Case I	Mene maculata		Mene maculata	reef-associated
GDYH8190	larvae	Terapon jarbua	MH190821	100			null			Case I	Terapon jarbua		Terapon jarbua	demersal
GDYH8191	larvae	Terapon jarbua	MH190821	100			null			Case I	Terapon jarbua		Terapon jarbua	demersal
GDYH8192	larvae	Terapon jarbua	MH190821	100			null			Case I	Terapon jarbua		Terapon jarbua	demersal
GDYH8193	larvae	Terapon jarbua	MH190821	100			null			Case I	Terapon jarbua		Terapon jarbua	demersal
GDYH8195	larvae	Engyprosopon xenandrus	DQ521030	86.9	Psenopsis anomala	HM180802	83.58			Case III
GDYH8196	egg	Ophichthus frontalis	MF956899	88.63	Ophichthus mystacinus	MK391549	88.04			Case III
GDYH8197	egg	Lepturacanthus savala	EF607438	96	Trichiurus brevis	JN990853	96			Case III
GDYH8198	larvae	Lepturacanthus savala	EF607438	100	Trichiurus brevis	JN990853	100			Case II		Trichiurus brevis	Trichiurus brevis	benthopelagic
GDYH8199	larvae	Encrasicholina punctifer	MH638725	100	Engraulis japonicus	KT718457	100			Case II		Encrasicholina punctifer	Encrasicholina punctifer	reef-associated
GDYH8200	larvae	Encrasicholina punctifer	MH638725	100	Engraulis japonicus	KT718457	100			Case II		Encrasicholina punctifer	Encrasicholina punctifer	reef-associated
GDYH8201	larvae	Istiophorus platypterus	EF609528	100	Makaira nigricans	HQ024767	97.54			Case I	Istiophorus platypterus		Istiophorus platypterus	pelagic-oceanic
GDYH8202	larvae	Trachinotus baillonii	EF609480	100	Trachinotus sp.	MK567135	98			Case I	Trachinotus baillonii		Trachinotus baillonii	reef-associated
GDYH8204	egg	Trichiurus lepturus	KP267586	99.69	Trichiurus cf. lepturus var 1	HQ564306	99.69			Case II		Trichiurus nanhaiensis	Trichiurus nanhaiensis	benthopelagic
GDYH8206	egg	Trachinocephalus myops	KU943076	100	Trachinocephalus trachinus	MF040910	99.84			Case II		Trachinocephalus myops	Trachinocephalus myops	reef-associated
GDYH8207	egg	Trachinocephalus myops	EU595324	99.84	Trachinocephalus trachinus	MF040916	99.69			Case II		Trachinocephalus myops	Trachinocephalus myops	reef-associated	MF040916 have been amended to T.myops in the NCBI
GDYH8208	egg	Trachinocephalus myops	EU595324	100	Trachinocephalus trachinus	MF040916	99.84			Case II		Trachinocephalus myops	Trachinocephalus myops	reef-associated	MF040916 have been amended to T.myops in the NCBI
GDYH8210	egg	Scomberoides tol	DQ885123	100	Scomberoides lysan	EF609611	100			Case II		Scomberoides tol	Scomberoides tol	reef-associated
GDYH8211	larvae	Terapon jarbua	KT231922	99.84			null			Case I	Terapon jarbua		Terapon jarbua	demersal
GDYH8213	egg	Trachinocephalus myops	EU595324	100	Trachinocephalus trachinus	MF040916	99.85			Case II		Trachinocephalus myops	Trachinocephalus myops	reef-associated	MF040916 have been amended to T.myops in the NCBI
GDYH8214	egg	Trachinocephalus myops	EU595324	100	Trachinocephalus trachinus	MF040916	99.85			Case II		Trachinocephalus myops	Trachinocephalus myops	reef-associated	MF040916 have been amended to T.myops in the NCBI
GDYH8215	egg	Trachinocephalus myops	EU595324	100	Trachinocephalus trachinus	MF040916	99.85			Case II		Trachinocephalus myops	Trachinocephalus myops	reef-associated	MF040916 have been amended to T.myops in the NCBI
GDYH8217	egg	Tentoriceps cristatus	KP267579	99.84	Tentoriceps sp. JP-2017	KY675418	93.17			Case I	Tentoriceps cristatus		Tentoriceps cristatus	benthopelagic
GDYH8218	egg	Uranoscopus oligolepis	FJ237963	99.54	Uranoscopus tosae	KX641475	99.26			Case II		Uranoscopus oligolepis	Uranoscopus tosae	demersal
GDYH8219	egg	Coryphaena hippurus	DQ885089	99.69			null			Case I	Coryphaena hippurus		Coryphaena hippurus	pelagic-neritic
GDYH8220	egg	Coryphaena hippurus	GU225570	99.85			null			Case I	Coryphaena hippurus		Coryphaena hippurus	pelagic-neritic
GDYH8221	egg	Mene maculata	EF607445	100	Alepes djedaba	KT588694	84.79			Case I	Mene maculata		Mene maculata	reef-associated
GDYH8222	egg	Mene maculata	EF607445	100	Alepes djedaba	MK777147	84.74			Case I	Mene maculata		Mene maculata	reef-associated
GDYH8224	egg	Mene maculata	EF607445	100	Alepes djedaba	MK777147	84.74			Case I	Mene maculata		Mene maculata	reef-associated
GDYH8225	egg	Mene maculata	EF607443	100	Alepes djedaba	MK777147	84.91			Case I	Mene maculata		Mene maculata	reef-associated
GDYH8226	egg	Mene maculata	KT718545	100	Alepes djedaba	MK777147	84.83			Case I	Mene maculata		Mene maculata	reef-associated
GDYH8228	egg	Mene maculata	EF607442	100	Alepes djedaba	KT588694	85.17			Case I	Mene maculata		Mene maculata	reef-associated
GDYH8229	egg	Mene maculata	EF607445	100	Alepes djedaba	MK777147	84.74			Case I	Mene maculata		Mene maculata	reef-associated
GDYH8230	egg	Thunnus tonggol	DQ107636	100	Thunnus albacares	KJ713183	100			Case II		Thunnus tonggol	Thunnus tonggol	pelagic-neritic
GDYH8231	larvae	Priacanthus macracanthus	KU943576	100	Priacanthus blochii	KF930310	88.08			Case I	Priacanthus macracanthus		Priacanthus macracanthus	reef-associated
GDYH8232	larvae	Gonorynchus abbreviatus	KP266793	100	Gonorynchus forsteri	MN123361	87.94			Case I	Gonorynchus abbreviatus		Gonorynchus abbreviatus	demersal
GDYH8233	larvae	Upeneus japonicus	EF607606	99.84	Upeneus margarethae	MT348773	99.67			Case II		Upeneus japonicus	Upeneus japonicus	reef-associated
GDYH8236	egg	Mene maculata	EF607445	99.85	Alepes djedaba	MK777147	84.74			Case I	Mene maculata		Mene maculata	reef-associated
GDYH8237	egg	Mene maculata	EF607445	99.84	Alepes djedaba	MK777147	84.92			Case I	Mene maculata		Mene maculata	reef-associated
GDYH8238	egg	Mene maculata	EF607445	100	Alepes djedaba	MK777147	84.74			Case I	Mene maculata		Mene maculata	reef-associated
GDYH8239	egg	Mene maculata	EF607445	100	Alepes djedaba	MK777147	84.81			Case I	Mene maculata		Mene maculata	reef-associated
GDYH8241	egg	Mene maculata	EF607445	100	Alepes djedaba	MK777147	84.74			Case I	Mene maculata		Mene maculata	reef-associated
GDYH8242	egg	Mene maculata	EF607445	100	Alepes djedaba	MK777147	85.12			Case I	Mene maculata		Mene maculata	reef-associated
GDYH8243	egg	Mene maculata	EF607445	100	Alepes djedaba	MK777147	84.74			Case I	Mene maculata		Mene maculata	reef-associated
GDYH8244	egg	Mene maculata	EF607445	99.85	Alepes djedaba	MK777147	85			Case I	Mene maculata		Mene maculata	reef-associated
GDYH8246	egg	Mene maculata	EF607442	100	Alepes djedaba	MK777147	85.17			Case I	Mene maculata		Mene maculata	reef-associated
GDYH8251	egg	Mene maculata	EF607445	100	Alepes djedaba	MK777147	84.81			Case I	Mene maculata		Mene maculata	reef-associated
GDYH8254	egg	Tentoriceps cristatus	KU878691	100	Tentoriceps sp. JP-2017	KY675418	93.33			Case I	Tentoriceps cristatus		Tentoriceps cristatus	benthopelagic
GDYH8255	egg	Decapterus macrosoma	MH638795	100	Decapterus muroadsi	HQ010055	99.15			Case II		Decapterus macrosoma	Decapterus macrosoma	reef-associated
GDYH8256	egg	Decapterus macrosoma	GU673628	100	Decapterus muroadsi	HQ010055	99.32			Case II		Decapterus macrosoma	Decapterus macrosoma	reef-associated
GDYH8257	egg	Decapterus macrosoma	GU673628	100	Decapterus muroadsi	HQ010055	99.32			Case II		Decapterus macrosoma	Decapterus macrosoma	reef-associated
GDYH8258	egg	Decapterus macrosoma	KU943781	100	Decapterus muroadsi	HQ010055	99.32			Case II		Decapterus macrosoma	Decapterus macrosoma	reef-associated
GDYH8259	egg	Decapterus macrosoma	GU673628	100	Decapterus muroadsi	HQ010055	99.32			Case II		Decapterus macrosoma	Decapterus macrosoma	reef-associated
GDYH8260	egg	Decapterus macrosoma	JF493342	100	Decapterus muroadsi	HQ010055	99.32			Case II		Decapterus macrosoma	Decapterus macrosoma	reef-associated
GDYH8261	egg	Decapterus macrosoma	GU673628	100	Decapterus muroadsi	HQ010055	99.32			Case II		Decapterus macrosoma	Decapterus macrosoma	reef-associated
GDYH8262	egg	Decapterus macrosoma	KU943781	100	Decapterus muroadsi	HQ010055	99.32			Case II		Decapterus macrosoma	Decapterus macrosoma	reef-associated
GDYH8263	egg	Decapterus macrosoma	JX261121	99.84	Decapterus muroadsi	HQ010055	99.15			Case II		Decapterus macrosoma	Decapterus macrosoma	reef-associated
GDYH8264	egg	Decapterus macrosoma	MH638795	100	Decapterus muroadsi	HQ010055	99.15			Case II		Decapterus macrosoma	Decapterus macrosoma	reef-associated
GDYH8265	egg	Decapterus macrosoma	JX260997	99.69	Decapterus muroadsi	HQ010055	99.15			Case II		Decapterus macrosoma	Decapterus macrosoma	reef-associated
GDYH8266	egg	Decapterus macrosoma	MH085881	100	Decapterus muroadsi	HQ010055	99.31			Case II		Decapterus macrosoma	Decapterus macrosoma	reef-associated
GDYH8267	larvae	Ostorhinchus kiensis	KP267644	99.85	Ostorhinchus bryx	HQ956507	91.22			Case I	Ostorhinchus kiensis		Ostorhinchus kiensis	reef-associated
GDYH8268	larvae	Lagocephalus spadiceus	EU595163	100	Lagocephalus gloveri	FJ434548	100			Case II			Lagocephalus spadiceus	demersal
GDYH8269	larvae	Terapon jarbua	MH190821	100			null			Case I	Terapon jarbua		Terapon jarbua	demersal
GDYH8270	larvae	Terapon jarbua	JQ741340	100			null			Case I	Terapon jarbua		Terapon jarbua	demersal
GDYH8271	larvae	Terapon jarbua	MH190821	100			null			Case I	Terapon jarbua		Terapon jarbua	demersal
GDYH8272	larvae	Terapon jarbua	KP267659	99.85			null			Case I	Terapon jarbua		Terapon jarbua	demersal
GDYH8273	larvae	Terapon jarbua	MH190821	100			null			Case I	Terapon jarbua		Terapon jarbua	demersal
GDYH8275	egg	Sipunculus sp. MCZ DNA103550_1	KF042464	82.31	Sipunculus sp.	KF042460	82.31			Case III
GDYH8278	egg	Selar crumenophthalmus	JQ431681	100			null			Case I	Selar crumenophthalmus		Selar crumenophthalmus	reef-associated
GDYH8279	egg	Selar crumenophthalmus	JQ431681	100			null			Case I	Selar crumenophthalmus		Selar crumenophthalmus	reef-associated
GDYH8280	egg	Selar crumenophthalmus	JQ431681	100			null			Case I	Selar crumenophthalmus		Selar crumenophthalmus	reef-associated
GDYH8281	egg	Selar crumenophthalmus	MH638727	99.85			null			Case I	Selar crumenophthalmus		Selar crumenophthalmus	reef-associated
GDYH8282	egg	Selar crumenophthalmus	MH638727	99.85			null			Case I	Selar crumenophthalmus		Selar crumenophthalmus	reef-associated
GDYH8283	egg	Selar crumenophthalmus	JQ431681	100			null			Case I	Selar crumenophthalmus		Selar crumenophthalmus	reef-associated
GDYH8284	egg	Selar crumenophthalmus	JX261306	100			null			Case I	Selar crumenophthalmus		Selar crumenophthalmus	reef-associated
GDYH8285	egg	Selar crumenophthalmus	MK658199	99.85			null			Case I	Selar crumenophthalmus		Selar crumenophthalmus	reef-associated
GDYH8287	egg	Selar crumenophthalmus	JQ431681	100			null			Case I	Selar crumenophthalmus		Selar crumenophthalmus	reef-associated
GDYH8288	egg	Selar crumenophthalmus	MH638727	99.85			null			Case I	Selar crumenophthalmus		Selar crumenophthalmus	reef-associated
GDYH8289	egg	Selar crumenophthalmus	JQ431681	100			null			Case I	Selar crumenophthalmus		Selar crumenophthalmus	reef-associated
GDYH8291	egg	Coryphaena hippurus	DQ885002	100			null			Case I	Coryphaena hippurus		Coryphaena hippurus	pelagic-neritic
GDYH8294	larvae	Oxyporhamphus micropterus	KX579979	98.92	Hemiramphus brasiliensis	JQ842164	93.54			Case I	Oxyporhamphus micropterus		Oxyporhamphus micropterus	pelagic-oceanic
GDYH8295	larvae	Elagatis bipinnulata	MK995097	100	Trachinotus botla	GU673700	86.88			Case I	Elagatis bipinnulata		Elagatis bipinnulata	reef-associated
GDYH8296	larvae	Caranx ignobilis	JQ431540	100	Caranx heberi	JF493037	95.74			Case I	Caranx ignobilis		Caranx ignobilis	reef-associated
GDYH8297	larvae	Coryphaena hippurus	DQ885089	100			null			Case I	Coryphaena hippurus		Coryphaena hippurus	pelagic-neritic
GDYH8298	egg	Trachinocephalus myops	EU595324	100	Trachinocephalus trachinus	MF040916	99.85			Case II		Trachinocephalus myops	Trachinocephalus myops	reef-associated	MF040916 have been amended to T.myops in the NCBI
GDYH8299	egg	Trachinocephalus myops	EU595324	100	Trachinocephalus trachinus	MF040916	99.85			Case II		Trachinocephalus myops	Trachinocephalus myops	reef-associated	MF040916 have been amended to T.myops in the NCBI
GDYH8300	egg	Trachinocephalus trachinus	MF040914	100	Trachinocephalus myops	MF040900	100			Case II		Trachinocephalus myops	Trachinocephalus myops	reef-associated	MF040916 have been amended to T.myops in the NCBI
GDYH8301	egg	Trachinocephalus myops	EU595324	100	Trachinocephalus trachinus	MF040916	99.85			Case II		Trachinocephalus myops	Trachinocephalus myops	reef-associated	MF040916 have been amended to T.myops in the NCBI
GDYH8303	egg	Trachinocephalus myops	EU595324	100	Trachinocephalus trachinus	MF040916	99.85			Case II		Trachinocephalus myops	Trachinocephalus myops	reef-associated	MF040916 have been amended to T.myops in the NCBI
GDYH8304	larvae	Terapon jarbua	KP204170	100			null			Case I	Terapon jarbua		Terapon jarbua	demersal
GDYH8305	egg	Decapterus macrosoma	GU673628	100	Decapterus muroadsi	HQ010055	99.32			Case II		Decapterus macrosoma	Decapterus macrosoma	reef-associated
GDYH8307	egg	Decapterus macrosoma	KU943781	99.82	Decapterus muroadsi	HQ010055	99.15			Case II		Decapterus macrosoma	Decapterus macrosoma	reef-associated
GDYH8308	larvae	Cubiceps whiteleggii	AB205443	100	Cubiceps pauciradiatus	NC_013150	100			Case II		Cubiceps whiteleggii	Cubiceps whiteleggii	benthopelagic
GDYH8439	larvae	Priacanthus macracanthus	KP266813	100	Priacanthus blochii	KF815022	88.11			Case I	Priacanthus macracanthus		Priacanthus macracanthus	reef-associated
GDYH8440	larvae	Selar crumenophthalmus	JQ431681	100			null			Case I	Selar crumenophthalmus		Selar crumenophthalmus	reef-associated
GDYH8441	egg	Mene maculata	EF607445	100	Alepes djedaba	MK777147	84.72			Case I	Mene maculata		Mene maculata	reef-associated
GDYH8442	egg	Uranoscopus oligolepis	FJ237963	100	Uranoscopus tosae	KX641475	99.23			Case II		Uranoscopus oligolepis	Uranoscopus tosae	demersal
GDYH8443	egg	Mene maculata	EF607445	100	Alepes djedaba	MK777147	84.74			Case I	Mene maculata		Mene maculata	reef-associated
GDYH8444	egg	Coryphaena hippurus	DQ885001	100			null			Case I	Coryphaena hippurus		Coryphaena hippurus	pelagic-neritic
GDYH8445	egg	Mene maculata	EF607445	100	Alepes djedaba	MK777147	84.79			Case I	Mene maculata		Mene maculata	reef-associated
GDYH8454	egg	Mene maculata	EF607445	100	Alepes djedaba	MK777147	84.74			Case I	Mene maculata		Mene maculata	reef-associated
GDYH8455	egg	Mene maculata	EF607445	100	Alepes djedaba	KT588694	84.82			Case I	Mene maculata		Mene maculata	reef-associated
GDYH8456	egg	Selar crumenophthalmus	JX261452	100			null			Case I	Selar crumenophthalmus		Selar crumenophthalmus	reef-associated
GDYH8457	egg	Gnathophis heterognathos	MF539676	99.28	Gnathophis grahami	HM902536	97.23			Case I	Gnathophis heterognathos		Gnathophis heterognathos	benthopelagic
GDYH8458	egg	Trichiurus japonicus	KF788279	100	Trichiurus lepturus	KT733054	100			Case II		Trichiurus japonicus	Trichiurus japonicus	benthopelagic
GDYH8459	egg	Mene maculata	EF607443	100	Alepes djedaba	MK777147	84.91			Case I	Mene maculata		Mene maculata	reef-associated
GDYH8460	egg	Mene maculata	KT718545	100	Alepes djedaba	MK777147	84.74			Case I	Mene maculata		Mene maculata	reef-associated
GDYH8461	egg	Mene maculata	EF607445	100	Alepes djedaba	MK777147	84.74			Case I	Mene maculata		Mene maculata	reef-associated
GDYH8462	egg	Lutjanus russellii	MH085870	100	Lutjanus monostigma	MK777456	100			Case II		Lutjanus russellii	Lutjanus russellii	reef-associated
GDYH8463	larvae	Nemipterus bathybius	MN808444	100	Nemipterus japonicus	JQ681399	99.84			Case II		Nemipterus bathybius	Nemipterus bathybius	demersal
GDYH8464	larvae	Bregmaceros sp. SepW-37-24	MF415223	99.84	Bregmaceros sp.	HM421811	90.74			Case I	Bregmaceros sp. SepW-37-24		Bregmaceros sp.
GDYH8465	larvae	Bregmaceros sp. JP-2017	KY675482	92.91	Bregmaceros nectabanus	KU943122	92.21			Case III			Bregmaceros sp.
GDYH8466	egg	Gnathophis heterognathos	MF539676	99.27	Gnathophis grahami	HM902536	97.21			Case I	Gnathophis heterognathos		Gnathophis heterognathos	benthopelagic
GDYH8467	egg	Gnathophis heterognathos	MF539676	98.37	Gnathophis bathytopos	KC015424	94.62			Case I	Gnathophis heterognathos		Gnathophis heterognathos	benthopelagic
GDYH8468	egg	Gnathophis heterognathos	MF539676	99.28	Gnathophis grahami	HM902536	97.07			Case I	Gnathophis heterognathos		Gnathophis heterognathos	benthopelagic
GDYH8469	egg	Gnathophis heterognathos	MF539676	99.28	Gnathophis grahami	HM902536	97.24			Case I	Gnathophis heterognathos		Gnathophis heterognathos	benthopelagic
GDYH8470	egg	Gnathophis heterognathos	MF539676	99.27	Gnathophis grahami	HQ955949	97.21			Case I	Gnathophis heterognathos		Gnathophis heterognathos	benthopelagic
GDYH8471	egg	Gnathophis heterognathos	MF539676	99.28	Gnathophis grahami	HM902536	97.24			Case I	Gnathophis heterognathos		Gnathophis heterognathos	benthopelagic
GDYH8472	egg	Gnathophis heterognathos	MF539676	99.28	Gnathophis grahami	HQ955949	97.34			Case I	Gnathophis heterognathos		Gnathophis heterognathos	benthopelagic
GDYH8473	egg	Gnathophis heterognathos	MF539676	99.28	Gnathophis grahami	HM902536	97.24			Case I	Gnathophis heterognathos		Gnathophis heterognathos	benthopelagic
GDYH8474	egg	Gnathophis heterognathos	MF539676	99.28	Gnathophis grahami	HM902536	97.24			Case I	Gnathophis heterognathos		Gnathophis heterognathos	benthopelagic
GDYH8476	egg	Gnathophis heterognathos	MF539676	99.28	Gnathophis grahami	HM902536	97.24			Case I	Gnathophis heterognathos		Gnathophis heterognathos	benthopelagic
GDYH8478	larvae	Diaphus watasei	KC442072	100	Diaphus chrysorhynchus	AP012230	100			Case II			Diaphus watasei
GDYH8479	larvae	Bregmaceros sp. SepW-37-24	MF415223	99.54	Bregmaceros sp.	HM421811	90.59			Case I	Bregmaceros sp. SepW-37-24		Bregmaceros sp.
GDYH8480	larvae	Bregmaceros sp. JP-2017	KY675482	92.39	Bregmaceros nectabanus	KU943122	92.03			Case III			Bregmaceros sp.
GDYH8481	egg	Gymnothorax minor	MG755739	100	Gymnothorax reticularis	KU942762	100			Case II		Gymnothorax reticularis	Gymnothorax reticularis	demersal
GDYH8482	egg	Gymnothorax minor	MG755740	99.84	Gymnothorax reticularis	KU942760	99.64			Case II		Gymnothorax reticularis	Gymnothorax reticularis	demersal
GDYH8483	egg	Coryphaena hippurus	DQ885089	100			null			Case I	Coryphaena hippurus		Coryphaena hippurus	pelagic-neritic
GDYH8484	egg	Coryphaena hippurus	DQ885089	100			null			Case I	Coryphaena hippurus		Coryphaena hippurus	pelagic-neritic
GDYH8485	egg	Coryphaena hippurus	DQ885089	100			null			Case I	Coryphaena hippurus		Coryphaena hippurus	pelagic-neritic
GDYH8486	egg	Coryphaena hippurus	DQ885089	100			null			Case I	Coryphaena hippurus		Coryphaena hippurus	pelagic-neritic
GDYH8487	egg	Coryphaena hippurus	DQ885089	100			null			Case I	Coryphaena hippurus		Coryphaena hippurus	pelagic-neritic
GDYH8488	egg	Coryphaena hippurus	DQ885089	100			null			Case I	Coryphaena hippurus		Coryphaena hippurus	pelagic-neritic
GDYH8489	egg	Coryphaena hippurus	DQ885089	100			null			Case I	Coryphaena hippurus		Coryphaena hippurus	pelagic-neritic
GDYH8490	egg	Coryphaena hippurus	DQ885089	100			null			Case I	Coryphaena hippurus		Coryphaena hippurus	pelagic-neritic
GDYH8491	egg	Coryphaena hippurus	DQ885089	100			null			Case I	Coryphaena hippurus		Coryphaena hippurus	pelagic-neritic
GDYH8494	larvae	Psettina hainanensis	KP266862	99.39	Parabothus taiwanensis	MK617159	85.22			Case I	Psettina hainanensis		Psettina hainanensis	demersal
GDYH8496	egg	Coryphaena hippurus	KU668660	100			null			Case I	Coryphaena hippurus		Coryphaena hippurus	pelagic-neritic
GDYH8497	egg	Coryphaena hippurus	DQ885089	100			null			Case I	Coryphaena hippurus		Coryphaena hippurus	pelagic-neritic
GDYH8498	egg	Coryphaena hippurus	KX109245	99.27			null			Case I	Coryphaena hippurus		Coryphaena hippurus	pelagic-neritic
GDYH8499	egg	Coryphaena hippurus	DQ885089	100			null			Case I	Coryphaena hippurus		Coryphaena hippurus	pelagic-neritic
GDYH8500	egg	Coryphaena hippurus	DQ885089	100			null			Case I	Coryphaena hippurus		Coryphaena hippurus	pelagic-neritic
GDYH8501	egg	Coryphaena hippurus	DQ885089	100			null			Case I	Coryphaena hippurus		Coryphaena hippurus	pelagic-neritic
GDYH8502	egg	Coryphaena hippurus	DQ885089	100			null			Case I	Coryphaena hippurus		Coryphaena hippurus	pelagic-neritic
GDYH8503	egg	Coryphaena hippurus	DQ885089	100			null			Case I	Coryphaena hippurus		Coryphaena hippurus	pelagic-neritic
GDYH8504	egg	Psenopsis anomala	EU595251	100	Thunnus tonggol	KT718293	99.66			Case II		Psenopsis anomala	Psenopsis anomala	benthopelagic	KT718293 is unverified in NCBI
GDYH8509	larvae	Upeneus japonicus	EF607606	100	Upeneus margarethae	MT348773	99.84			Case II		Upeneus japonicus	Upeneus japonicus	reef-associated
GDYH8510	larvae	Terapon jarbua	MH190821	100			null			Case I	Terapon jarbua		Terapon jarbua	demersal
GDYH8511	egg	Tentoriceps cristatus	KP267579	99.85	Tentoriceps sp. JP-2017	KY675418	93.17			Case I	Tentoriceps cristatus		Tentoriceps cristatus	benthopelagic
GDYH8512	egg	Mene maculata	EF607445	100	Alepes djedaba	KT588694	84.82			Case I	Mene maculata		Mene maculata	reef-associated
GDYH8513	egg	Mene maculata	EF607443	100	Alepes djedaba	MK777147	84.92			Case I	Mene maculata		Mene maculata	reef-associated
GDYH8514	egg	Mene maculata	EF607443	100	Alepes djedaba	MK777147	84.91			Case I	Mene maculata		Mene maculata	reef-associated
GDYH8515	egg	Mene maculata	EF607445	99.84	Alepes djedaba	MK777147	84.58			Case I	Mene maculata		Mene maculata	reef-associated
GDYH8517	larvae	Upeneus japonicus	EF607606	100	Upeneus margarethae	MT348773	99.84			Case II		Upeneus japonicus	Upeneus japonicus	reef-associated
GDYH8518	larvae	Pristigenys niphonia	MK777691	100	Pristigenys refulgens	JN313086	91.5			Case I	Pristigenys niphonia		Pristigenys niphonia	reef-associated
GDYH8519	larvae	Seriola rivoliana	JF494501	99.85	Seriola dumerili	FJ237926	94.32			Case I	Seriola rivoliana		Seriola rivoliana	reef-associated
GDYH8520	larvae	Upeneus japonicus	EF607604	99.69	Upeneus margarethae	MT348773	99.35			Case II		Upeneus japonicus	Upeneus japonicus	reef-associated
GDYH8521	larvae	Upeneus japonicus	EF607606	100	Upeneus margarethae	MT348773	99.84			Case II		Upeneus japonicus	Upeneus japonicus	reef-associated
GDYH8522	larvae	Upeneus japonicus	EF607606	99.84	Upeneus margarethae	MT348773	99.67			Case II		Upeneus japonicus	Upeneus japonicus	reef-associated
GDYH8523	larvae	Upeneus japonicus	EF607606	100	Upeneus margarethae	MT348774	99.83			Case II		Upeneus japonicus	Upeneus japonicus	reef-associated
GDYH8524	larvae	Upeneus japonicus	EF607606	99.84	Upeneus margarethae	MT348773	99.67			Case II		Upeneus japonicus	Upeneus japonicus	reef-associated
GDYH8525	larvae	Terapon jarbua	KJ466137	100			null			Case I	Terapon jarbua		Terapon jarbua	demersal
