# Supplementary material for: Assemblage Structure of the Ichthyoplankton and Its Relationship With Environmental Factors in Spring and Autumn off the Pearl River Estuary
Source: Frontiers journal article supplement (doi:10.3389/fmars.2021.732970), 2021-09-16
Supplement: Table_2.XLSX [file Table_2.XLSX]

## Sheet: Sheet1
Supplemeantary Table 2 IRI index of ichthyoplankton taxa in spring and autumn off the Pearl River Estuary
Order	Family	Species	Abbreviations	Ecological types	Spring						Autumn
					Horizontal			Vertical			Horizontal			Vertical
					F%	A%	IRI	F%	A%	IRI	F%	A%	IRI	F%	A%	IRI
Anguilliformes	Congridae	Gnathophis heterognathos	GNHE	benthopelagic							8.33333	0.0604961	0.504134	8.33333	4.41767	36.8139
	Muraenidae	Gymnothorax reticularis	GYRE	demersal							8.33333	0.241984	2.01654
		Strophidon tetraporus	STRE	reef-associated				8.33333	0.15015	1.25125	8.33333	0.120992	1.00827
	Ophichthidae	Ophisurus serpens	OPSE	demersal	16.67	1.27	21.1709	8.33333	1.35135	11.2613	16.6667	0.120992	2.01654
		Ophichthus erabo	OPER	reef-associated	16.67	0.18	3.0006	8.33333	0.15015	1.25125
		Ophichthus sp.1			33.33	0.36	11.9988	41.6667	3.6036	150.15	8.33333	0.0604961	0.504134	16.6667	0.803213	13.3869
		Ophichthus sp.2			25	0.68	17	8.33333	0.3003	2.5025
		Ophichthus sp.3												8.33333	0.401606	3.34672
	Nettastomatidae	Saurenchelys fierasfer	SAFI	demersal	8.33	0.05	0.4165
Aulopiformes	Synodontidae	Saurida elongata	SAEL	demersal	16.67	0.45	7.5015	8.33333	0.3003	2.5025
		Saurida undosquamis	SAUN	reef-associated	16.67	0.45	7.5015	8.33333	0.3003	2.5025	16.6667	0.846945	14.1157
		Trachinocephalus myops	TRMY	reef-associated	25	0.45	11.25	33.3333	4.2042	140.14	25	0.181488	4.53721
Beloniformes	Exocoetidae	Oxyporhamphus micropterus	OXMI	pelagic-oceanic	50	1.04	52	8.33333	0.600601	5.00501
		Hirundichthys sp.			8.33	0.05	0.4165	8.33333	0.15015	1.25125
		Parexocoetus sp.			8.33	0.05	0.4165
	Hemiramphidae	Hemiramphus sp.			8.33333	0.0454339	0.378616
Clupeiformes	Chirocentridae	Chirocentrus dorab	CHDO	reef-associated							8.33333	0.120992	1.00827
	Engraulidae	Encrasicholina punctifer	ENPU	reef-associated							25	0.30248	7.56201	33.3333	2.40964	80.3213
Gasterosteiformes	Fistulariidae	Fistularia petimba	FIPE	reef-associated	16.6667	0.136302	2.27169
	Syngnathidae	Syngnathus acus*	SYAC	demersal	8.33333	0.0454339	0.378616
Gonnorhynchiformes	Gonorynchidae	Gonorynchus abbreviatus	GOAB	demersal							8.33333	0.0604961	0.504134
Perciformes	Apogonidae	Jaydia carinatus	JACA	reef-associated										8.33333	0.401606	3.34672
		Ostorhinchus fasciatus	OSFA	reef-associated				16.6667	0.45045	7.50751				0	0	0
		Ostorhinchus kiensis	OSKI	reef-associated							8.33333	0.0604961	0.504134	8.33333	0.401606	3.34672
		Ostorhinchus sp.						8.33333	0.15015	1.25125
	Carangidae	Caranx ignobilis	CAIG	reef-associated							8.33333	0.0604961	0.504134
		Decapterus macrosoma	DEMA	reef-associated	50	6.86052	343.026	33.3333	1.95195	65.0651	41.6667	7.50151	312.563	25	5.22088	130.522
		Decapterus maruadsi	DEMR	reef-associated	50	12.358	617.901	58.3333	14.5646	849.6
		Elagatis bipinnulata	ELBI	reef-associated							8.33333	0.0604961	0.504134
		Scomberoides tol	SCTO	reef-associated							8.33333	0.0604961	0.504134
		Selar crumenophthalmus	SECR	reef-associated	75	8.67787	650.841	50	5.70571	285.285	25	2.72232	68.0581	8.33333	0.401606	3.34672
		Seriola dumerili	SEDU	reef-associated				8.33333	0.15015	1.25125
		Seriola rivoliana	SERI	reef-associated							8.33333	0.0604961	0.504134
		Seriolina nigrofasciata	SENI	reef-associated	25	0.363471	9.08678				8.33333	0.0604961	0.504134	16.6667	0.803213	13.3869
		Trachinotus baillonii	TRBA	reef-associated	16.6667	0.0908678	1.51446				8.33333	0.0604961	0.504134
	Centrolophidae	Psenopsis anomala	PSAN	benthopelagic	66.6667	2.36256	157.504	41.6667	4.05405	168.919	8.33333	0.0604961	0.504134
	Coryphaenidae	Coryphaena hippurus	COHI	pelagic-neritic	58.3333	1.45388	84.8099	33.3333	1.5015	50.0501	66.6667	2.60133	173.422	16.6667	0.803213	13.3869
		Coryphaena equiselis	COEQ	pelagic-oceanic							8.33333	0.0604961	0.504134
	Gobiidae	Gobiidae gen. spp.	Gosp		33.3333	4.54339	151.446	41.6667	4.8048	200.2				8.33333	0.401606	3.34672
	Istiophoridae	Istiophorus platypterus	ISPL	pelagic-oceanic							8.33333	0.0604961	0.504134
	Labridae	Iniistius verrens	INVE	demersal							16.6667	0.181488	3.0248
	Leiognathidae	Leiognathus sp.			8.33333	0.0908678	0.757232				16.6667	0.181488	3.0248	8.33333	0.401606	3.34672
	Lutjanidae	Lutjanus russellii	LURU	reef-associated	25	2.8169	70.4225	16.6667	4.2042	70.0701				8.33333	0.401606	3.34672
	Menidae	Mene maculata	MEMA	reef-associated							66.6667	79.1289	5275.26	41.6667	69.8795	2911.65
	Nemipteridae	Nemipterus virgatus	NEVI	demersal	8.33333	0.863244	7.1937	16.6667	0.600601	10.01
		Nemipterus bathybius	NEBA	demersal	8.33333	0.363471	3.02893							8.33333	0.401606	3.34672
	Nomeidae	Cubiceps whiteleggii	CUWH	benthopelagic										8.33333	0.401606	3.34672
	Pomacentridae	Chromis margaritifer	CHMA	reef-associated				8.33333	0.15015	1.25125
	Priacanthidae	Priacanthus macracanthus	PRMA	reef-associated							16.6667	0.120992	2.01654
		Pristigenys niphonia	PRNI	reef-associated							8.33333	0.0604961	0.504134
	Scombridae	Auxis thazard	AUTH	pelagic-neritic	50	4.40709	220.354	25	2.55255	63.8138	16.6667	0.120992	2.01654
		Auxis rochei	AURO	pelagic-neritic	33.3333	3.49841	116.614	33.3333	8.85886	295.295	8.33333	0.0604961	0.504134	16.6667	0.803213	13.3869
		Euthynnus affinis	EUAF	pelagic-neritic	16.6667	1.54475	25.7459
		Rastrelliger kanagurta	RAKA	pelagic-neritic	8.33333	0.545207	4.54339
		Thunnus tonggol	THTO	pelagic-neritic							8.33333	0.0604961	0.504134
	Serranidae	Chelidoperca stella	CHST	reef-associated				8.33333	0.15	1.25
		Epinephelus sp.			16.6667	0.136302	2.27169
	Teraphntidae	Terapon jarbua	TEJA	demersal	50	18.9459	947.297	25	28.68	716.97	66.6667	1.63339	108.893	25	4.41767	110.442
	Trichiuridae	Tentoriceps cristatus	TECR	benthopelagic	50	1.81736	90.8678	33.3333	1.35	45.05				8.33333	0.803213	6.69344
		Trichiurus japonicus	TRJA	benthopelagic	91.6667	6.99682	641.375	58.3333	2.7	157.66				8.33333	0.401606	3.34672
		Trichiurus brevis	TRBR	benthopelagic	8.33333	0.363471	3.02893	25	1.35	33.78				16.6667	1.60643	26.7738
		Trichiurus nanhaiensis	TRNA	benthopelagic	75	3.13494	235.12	8.33333	0.15	1.25
	Trichonotidae	Trichonotus sp.						8.33333	0.15	1.25
	Uranoscopidae	Uranoscopus tosae	KROL	demersal	8.33333	0.726942	6.05785				16.6667	0.241984	4.03307	8.33333	0.401606	3.34672
	Mullidae	Upeneus japonicus	RPJA	reef-associated	91.6667	10.677	978.722	16.6667	0.3	5.01	50	2.05687	102.843	8.33333	0.401606	3.34672
Pleuronectiformes	Paralichthyidae	Arnoglossus tenuis	ARTE	demersal	25	0.863244	21.5811	33.3333	1.35	33.78	25	0.181488	4.53721
	Soleidae	Heteromycteris japonicus	HEJA	demersal				8.33333	0.6	5.01
	Bothidae	Psettina hainanensis	PSHA	demersal	8.33333	0.0454339	0.378616				8.33333	0.0604961	0.504134
		Engyprosopon multisquama	ENMU	demersal				8.33333	0.3	2.5
	Samaridae	Samaris cristatus	SACR	demersal				8.33333	0.15	1.25
Scorpaeniformes	Platycephalidae	Rogadius asper	ROAS	demersal				16.6667	1.2	20.02
		Platycephalidae sp.1*			8.33333	0.0454339	0.378616
	Scorpaenidae	Scorpaenidae sp.			8.33333	0.0454339	0.378616
Tetraodontiformes	Tetraodontidae	Lagocephalus spadiceus	LASP	demersal				8.33333	0.45	3.75				8.33333	0.401606	3.34672
Myctophiformes	Myctophidae	Diaphus watasei	DIWA	benthopelagic				8.33333	0.15	1.25				8.33333	0.401606	3.34672
Gadiformes	Bregmacerotidae	Bregmaceros macclellandii*	BRMA	pelagic-oceanic										8.33333	0.803213	6.69344
		Bregmaceros sp.			8.33333	0.136302	1.13585	8.33333	0.15	1.25	8.33333	0.120992	1.00827	33.3333	1.60643	53.5475
Mugiliformes	Mugilidae	Planiliza affinis *	PLAF	pelagic-neritic	8.33333	0.0454339	0.378616
Stomiiformes	Gonostomatidae	Cyclothone sp.			16.6667	0.136302	2.27169	8.33333	0.15	1.25
		Unidentified									16.6667	0.181488	3.0248
Note: *, indicated that the taxa was identified by morphology
