# Supplementary material for: Assemblage Structure of the Ichthyoplankton and Its Relationship With Environmental Factors in Spring and Autumn off the Pearl River Estuary
Source: Frontiers journal article supplement (doi:10.3389/fmars.2021.732970), 2021-09-16
Supplement: Table_3.XLSX [file Table_3.XLSX]

## Sheet: Sheet1
Supplementary Table 3 The representive taxa and their contributions to the average similarity within group in horizontal samples in spring and autumn of 2019
Spring
Cluster I				Cluster II				Cluster III
Average similarity 46.21%				Average similarity 56.08%				Average similarity 48.43%
Species	average similarity	Contribution%	Cum.%	Species	average similarity	Contribution%	Cum.%	Species	average similarity	Contribution%	Cum.%
Gobiidae gen. spp.	9.32	20.16	20.16	Decapterus maruadsi	19.55	34.87	34.87	Upeneus japonicus	14.31	29.55	29.55
Terapon jarbua	5.72	12.37	32.53	Upeneus japonicus	14.11	25.16	60.03	Decapterus macrosoma	8.13	16.78	46.33
Psenopsis anomala	4.85	10.49	43.02	Trichiurus japonicus	5.18	9.24	69.27	Selar crumenophthalmus	5.39	11.14	57.47
Tentoriceps cristatus	4.24	9.17	52.2	Selar crumenophthalmus	4.07	7.26	76.53	Oxyporhamphus micropterus	5.17	10.68	68.15
Nemipterus virgatus	4.05	8.76	60.96	Psenopsis anomala	3.66	6.52	83.05	Trichiurus japonicus	4.47	9.23	77.38
Autumn
Cluster I				Cluster II				Cluster III				Cluster IV
Average similarity **%				Average similarity 36.75%				Average similarity 70.31%				Average similarity 48.43%
Species	average similarity	Contribution%	Cum.%	Species	average similarity	Contribution%	Cum.%	Species	average similarity	Contribution%	Cum.%	Species	average similarity	Contribution%	Cum.%
Less than two samples in cluster				Decapterus macrosoma	19.19	52.21	52.21	Mene maculata	60.48	86.01	86.01	Terapon jarbua	33.47	69.1	69.1
				Mene maculata	11.08	30.14	82.36	Coryphaena hippurus	5.96	8.48	94.5	Coryphaena hippurus	9.91	20.46	89.55
				Terapon jarbua	6.48	17.64	100					Upeneus japonicus	5.06	10.45	100
