# Supplementary material for: Assemblage Structure of the Ichthyoplankton and Its Relationship With Environmental Factors in Spring and Autumn off the Pearl River Estuary
Source: Frontiers journal article supplement (doi:10.3389/fmars.2021.732970), 2021-09-16
Supplement: Table_4.DOCX [file Table_4.DOCX]

**Supplementary Table 4 Environmental variables (mean±SD) off the Pearl River Estuary**

| Environmental variables | Spring | Autumn |
| --- | --- | --- |
| SSS (PSU) | 34.21±0.08 | 33.92±0.02 |
| SST (℃) | 26.58±0.82 | 28.83±0.03 |
| T-10 (℃) | 26.27±0.52 | 28.24±0.32 |
| T-40 (℃) | 23.63±0.80 | 28.06±0.35 |
| SLA (mm) | 614.21±28.03 | 617.98±25.04 |
| Depth (m) | 75.73±21.88 | 78.00±14.86 |
| Distance (km) | 133.11±50.03 | 133.11±50.03 |
