# Supplementary material for: Assemblage Structure of the Ichthyoplankton and Its Relationship With Environmental Factors in Spring and Autumn off the Pearl River Estuary
Source: Frontiers journal article supplement (doi:10.3389/fmars.2021.732970), 2021-09-16
Supplement: Table_5.DOCX [file Table_5.DOCX]

**Supplementary Table 5 Conditional effect, coefficients and correlation of the environmental variables with the first two axis of CCA**

| Variable | F | p | VIF | Coefficient | | Correlation | |
| --- | --- | --- | --- | --- | --- | --- | --- |
| Axis1 | Axis2 | Axis1 | Axis2 |
| SLA | 1.357 | 0.149 | 1.6 | -0.31 | 0.51 | -0.35 | **0.55** |
| SSS | 2.771 | **0.001** | 3.13 | -0.66 | -0.52 | **-0.75** | **-0.56** |
| T-10 | 3.125 | **0.001** | 3.58 | 0.81 | -0.22 | **0.92** | -0.23 |
| Depth | 1.678 | **0.044** | 5.35 | 0.34 | -0.51 | 0.38 | **-0.55** |
| Distance | 1.626 | **0.032** | 4.94 | 0.33 | -0.48 | 0.37 | **-0.52** |
